# Supplementary material for: Heterometal–organic framework with pcu net constructed from mixed linear ligands
Source: Royal Society of Chemistry journal article supplement (doi:10.1039/c4ce00282b), 2014-01-01
Supplement: c4ce00282b1.pdf [file c4ce00282b1.pdf]

# Heterometal-organic framework with *pcu* net constructed from mixed linear ligands

**Wei-Hui Fang, and Guo-Yu Yang\***

*State Key Laboratory of Structural Chemistry, Fujian Institute of Research on the Structure of Matter, Chinese Academy of Sciences, Fuzhou, Fujian 350002, China*

## Content

**Table S1** Selected bond lengths (Å) for compound **1**.

**Table S2** Hydrogen bond lengths (Å) and bond angles (°) for compound **1**.

**Fig. S1** View of the asymmetric unit of **1**.

**Fig. S2** The polyhedral representation of La (left) and Cu atoms in **1** (right).

**Fig. S3** The scheme representation of the bilayer and the side views along the *b* and *a* axis.

**Fig. S4** The side view of the 3D framework of compound **1**.

**Fig. S5** Simulated and experimental PXRD patterns of **1**.

**Fig. S6** The IR spectrum of compound **1**.

**Fig. S7** TGA curve of compound **1**.

**Fig. S8** The experimental PXRD of **1** from room temperature to 300°C.

**Fig. S9** UV-vis-IR optical diffuse reflectance spectrum for **1**.

**Table S1** Selected bond lengths (Å) for compound **1**

| Compound <b>1</b> |          |              |          |
|-------------------|----------|--------------|----------|
| La(1)-O(1)        | 2.620(8) | La(2)-O(27)  | 2.666(5) |
| La(1)-O(2)        | 2.547(7) | La(2)-O(28)B | 2.634(5) |
| La(1)-O(21)       | 2.638(6) | La(2)-O(5)   | 2.649(8) |
| La(1)-O(22)       | 2.478(8) | La(2)-O(6)   | 2.572(8) |
| La(1)-O(23)A      | 2.640(6) | La(2)-O(9)   | 2.576(7) |
| La(1)-O(24)A      | 2.698(5) | Cu(1)-N(3)   | 2.020(8) |
| La(1)-O(3)        | 2.594(7) | Cu(1)-N(6)C  | 2.011(8) |
| La(1)-O(4)        | 2.575(7) | Cu(1)-N(5)D  | 2.017(7) |
| La(1)-O(7)        | 2.615(7) | Cu(1)-O(21)  | 2.169(6) |
| La(1)-O(8)        | 2.613(8) | Cu(1)-O(23)A | 2.001(6) |
| La(2)-O(10)       | 2.606(7) | Cu(2)-N(1)E  | 2.015(7) |
| La(2)-O(11)       | 2.558(8) | Cu(2)-N(2)F  | 2.018(8) |
| La(2)-O(12)       | 2.625(7) | Cu(2)-N(4)   | 2.025(8) |
| La(2)-O(25)       | 2.677(6) | Cu(2)-O(25)  | 2.192(5) |
| La(2)-O(26)B      | 2.753(4) | Cu(2)-O(28)B | 2.014(5) |

Symmetry transformations used to generate equivalent atoms A:  $-x+1, y-1/2, -z+1/2$ ; B:  $-x, y-1/2, -z+1/2$ ; C:  $x+1, y, z$ ; D:  $-x+1, -y+1, -z+1$ ; E:  $-x, -y+1, -z$ ; F:  $x-1, y, z$ .

**Table S2** Hydrogen bond lengths (Å) and bond angles ( $^{\circ}$ ) for compound **1**

| Hydrogen bonds                    |        |          |          |                |
|-----------------------------------|--------|----------|----------|----------------|
| D-H...A                           | d(D-H) | d(H...A) | d(D...A) | $\angle$ (DHA) |
| O(14)-H(14B)...N(7) <sup>G</sup>  | 0.82   | 1.76     | 2.582(1) | 176.6          |
| O(16)-H(16B)...N(8) <sup>G</sup>  | 0.82   | 1.86     | 2.66(3)  | 166.1          |
| O(18)-H(18A)...N(9) <sup>H</sup>  | 0.82   | 1.78     | 2.601(1) | 174.6          |
| O(20)-H(20B)...N(10) <sup>H</sup> | 0.82   | 1.78     | 2.591(1) | 171.9          |

Symmetry codes: G  $x, y+1, z$ ; H  $x, y-1, z$ .

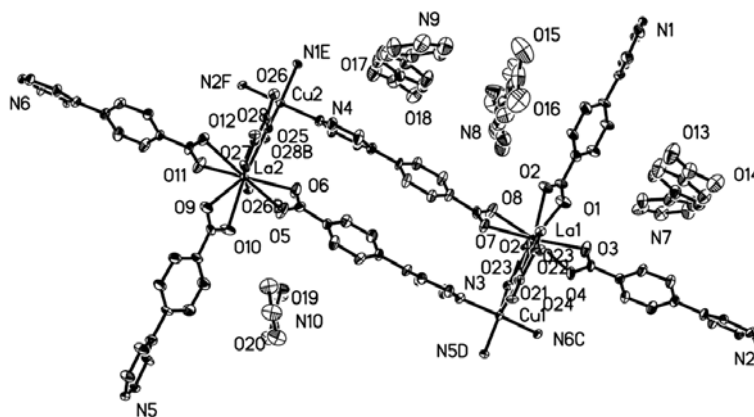

**Fig. S1** View of the asymmetric unit of **1**. All hydrogen atoms are omitted for clarity. Atoms having A-F in their labels are symmetry-generated. Symmetry codes A:  $-x+1, y-1/2, -z+1/2$ ; B:  $-x, y-1/2, -z+1/2$ ; C:  $x+1, y, z$ ; D:  $-x+1, -y+1, -z+1$ ; E:  $-x, -y+1, -z$ ; F:  $x-1, y, z$ .

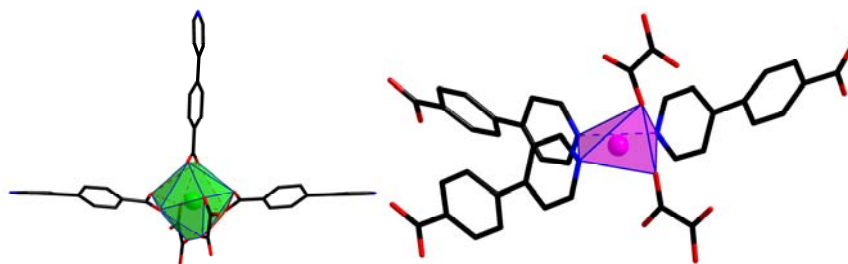

Fig. S2 The coordinate environment of La (left) and Cu atoms in **1** (right).

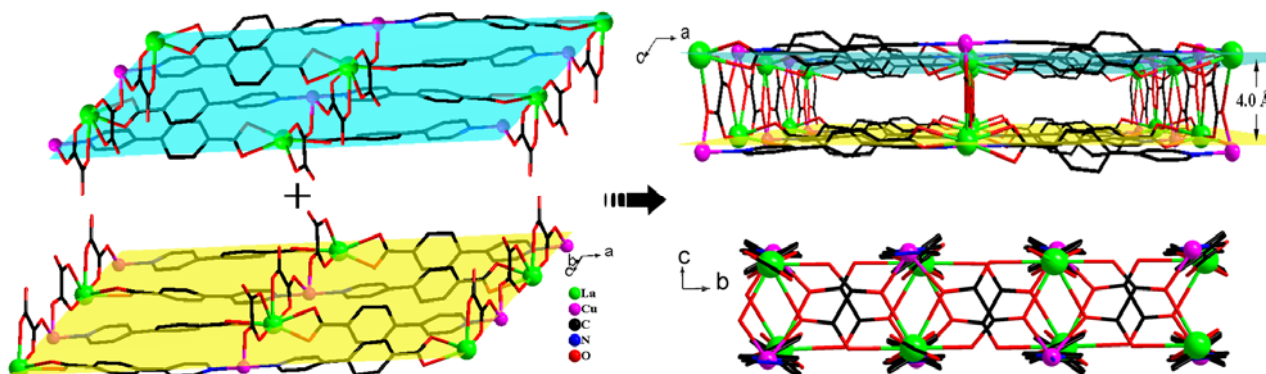

Fig. S3 The scheme representation of the bilayer and the side views along the *b* and *a* axis.

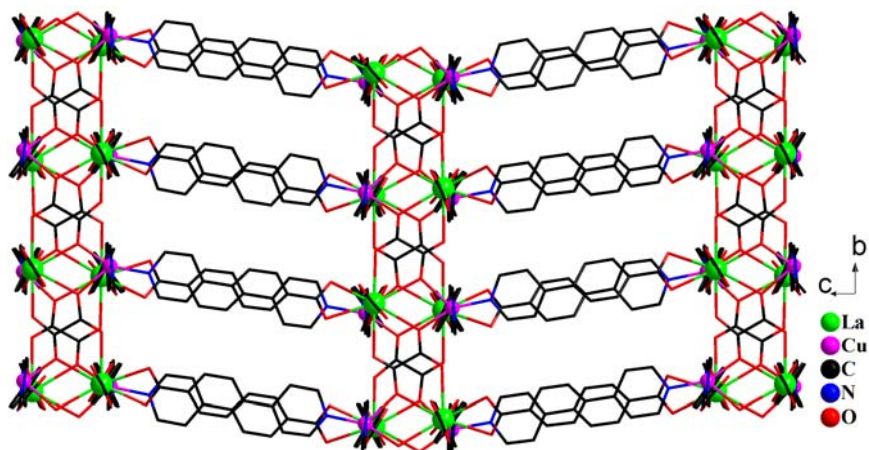

Fig. S4 The side view of the 3D framework of compound **1**.

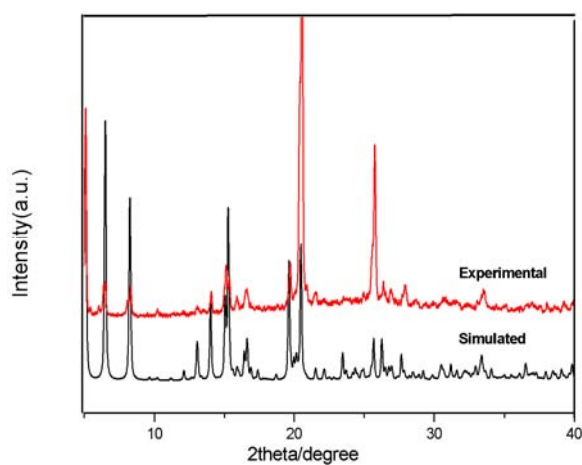

Fig. S5 Simulated and experimental PXRD patterns of **1**.

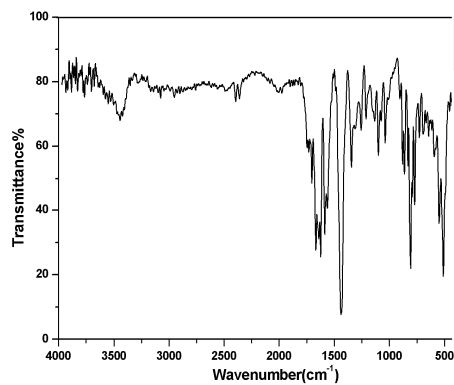

Fig. S6 The IR spectrum of compound **1**.

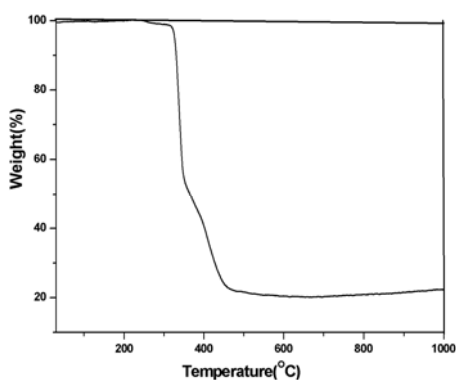

Fig. S7 TGA curve of compound **1**.

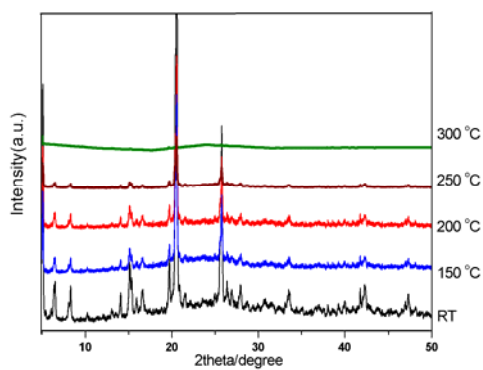

Fig. S8 The experimental PXRD of **1** from room temperature to 300 °C.

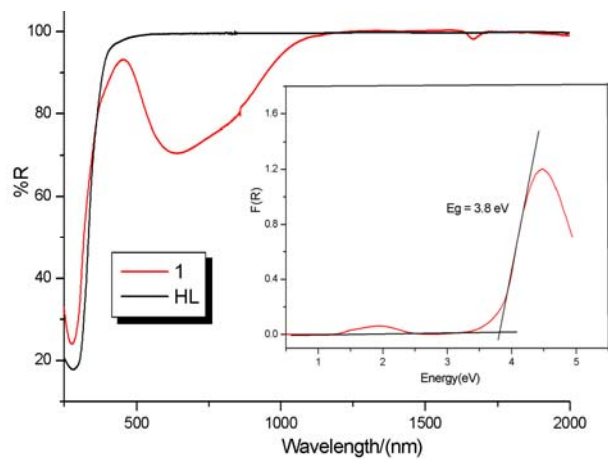

Fig. S9 UV-vis-IR optical diffuse reflectance spectrum for **1**.
